# Supplementary figures and images for: NOVA regulates Dcc alternative splicing during neuronal migration and axon guidance in the spinal cord
Source: eLife journal article supplement (doi:10.7554/elife.14264), 2016-05-25

Figure 3-figure supplement 2

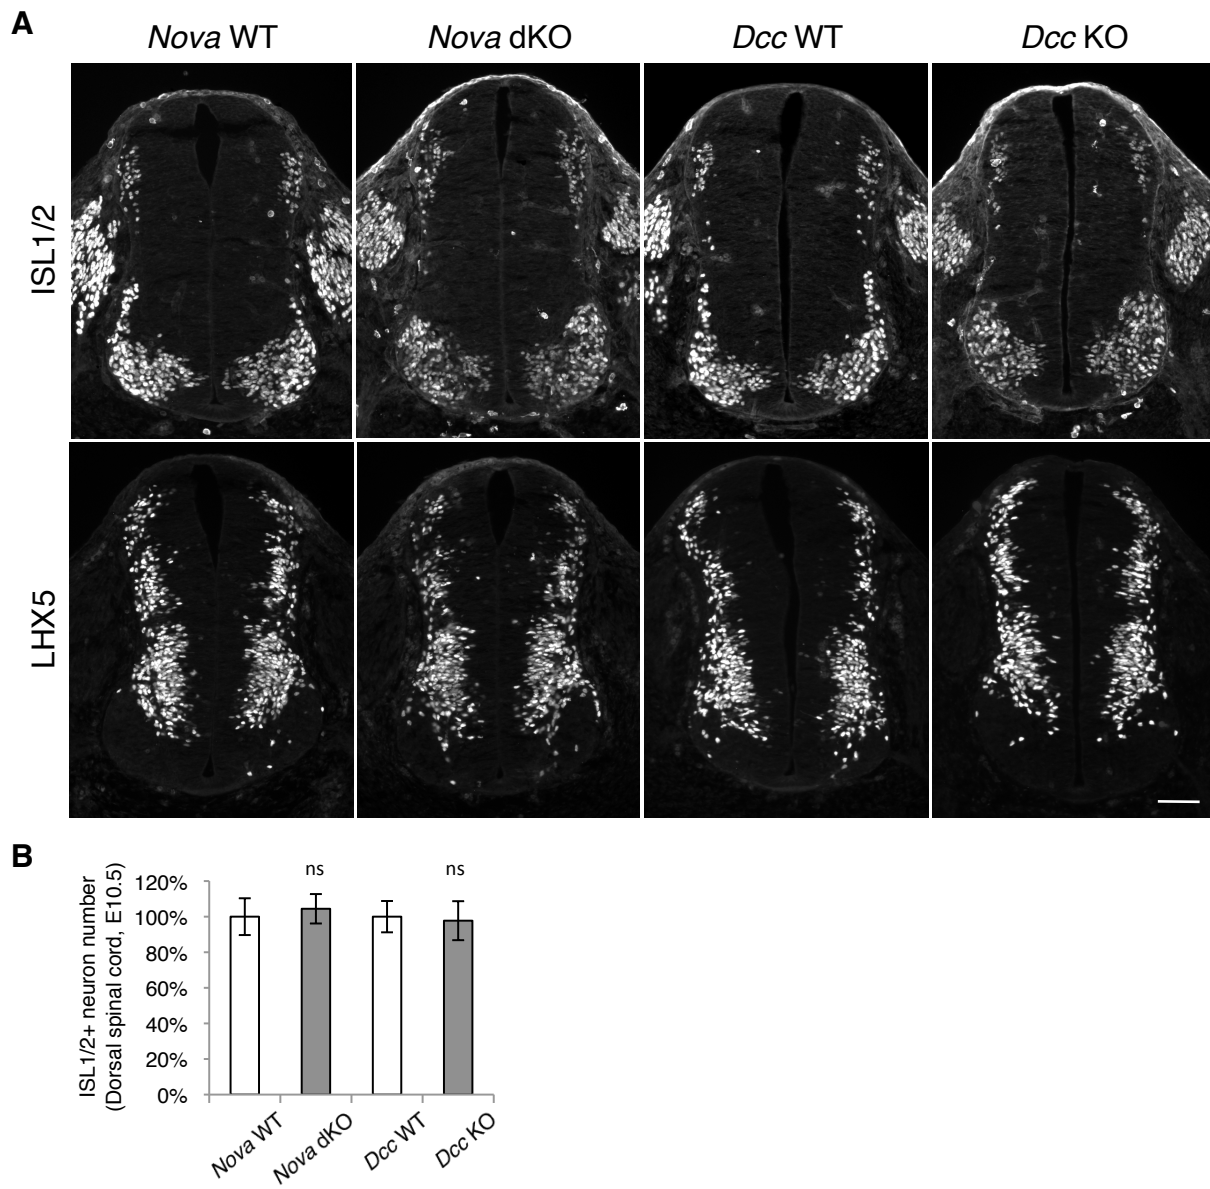

Supplement: supp [file elife-14264-supp-v1.zip]

Figure 1-figure supplement 1

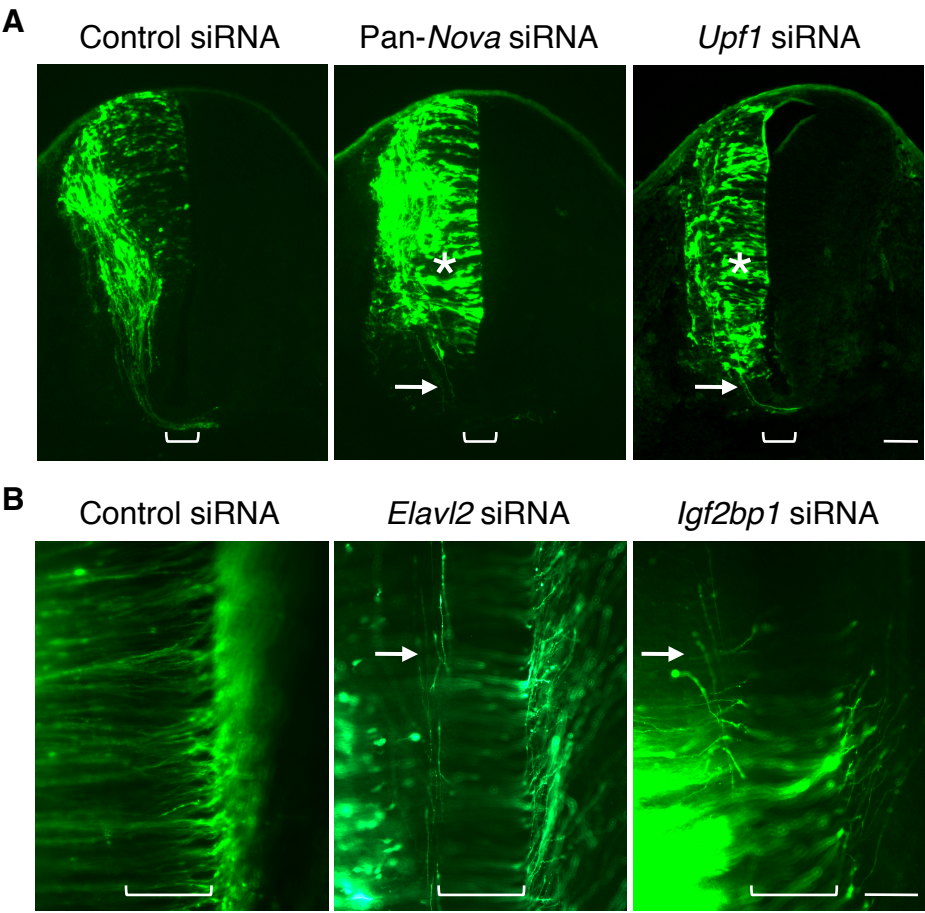

Supplement: supp [file elife-14264-supp-v1.zip]

**Figure 1-figure supplement 2**

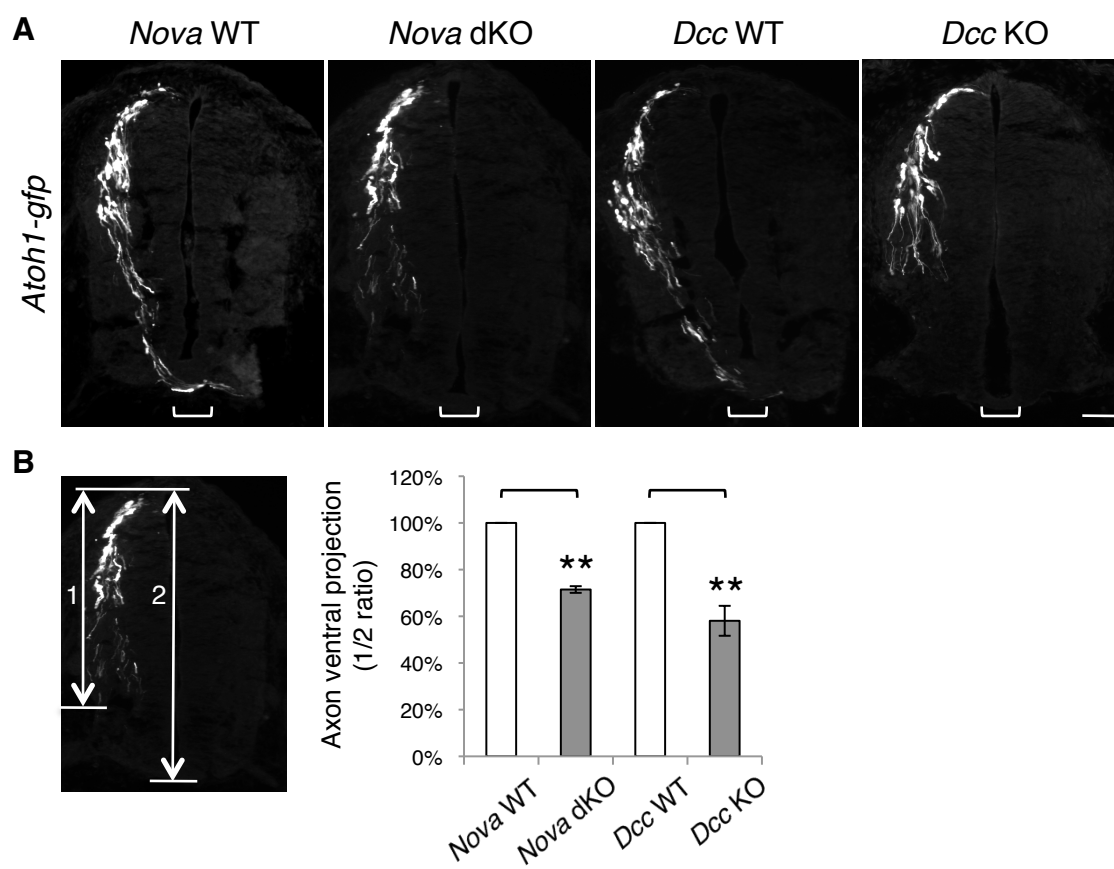

Supplement: supp [file elife-14264-supp-v1.zip]

Figure 5-figure supplement 1

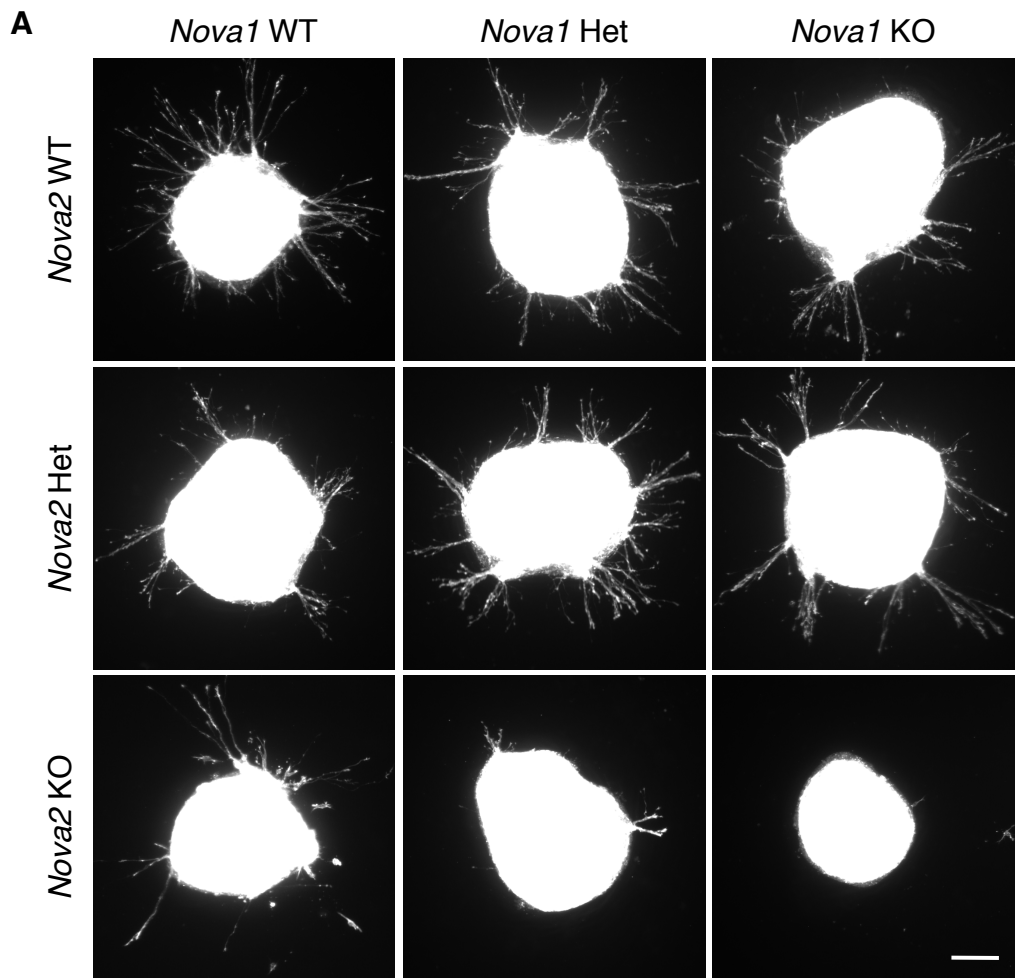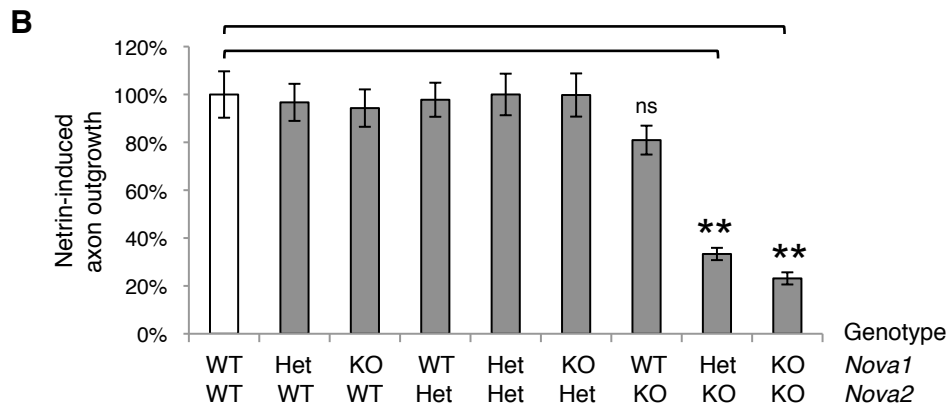

Supplement: supp [file elife-14264-supp-v1.zip]

Figure 7-figure supplement 2

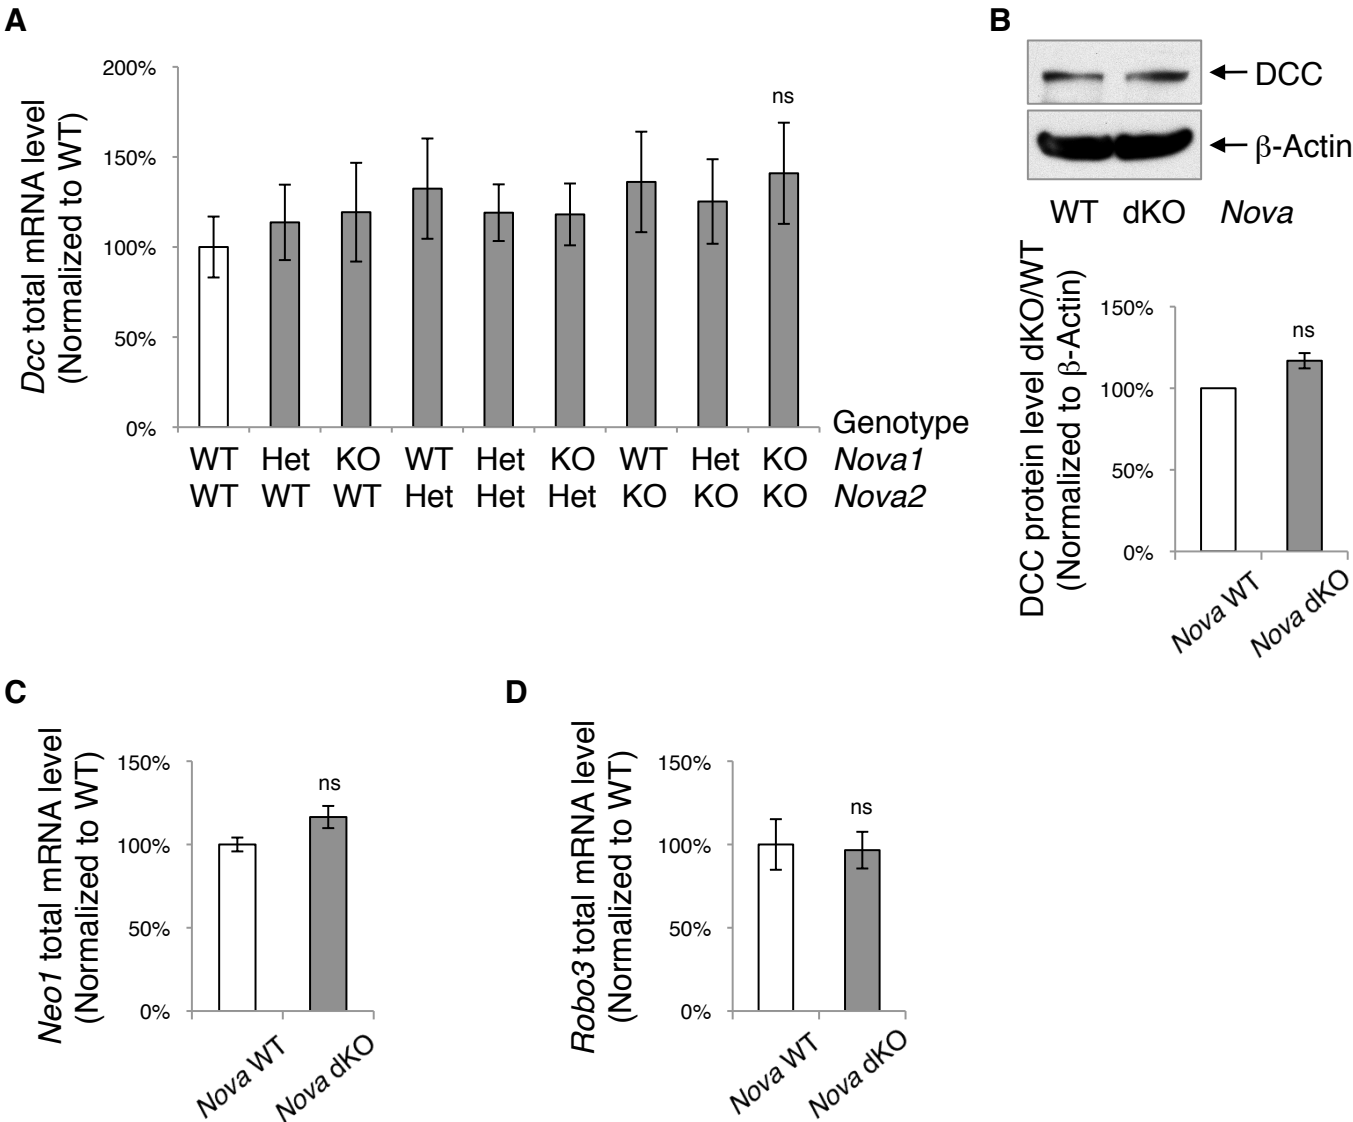

Supplement: supp [file elife-14264-supp-v1.zip]

Figure 6-figure supplement 1

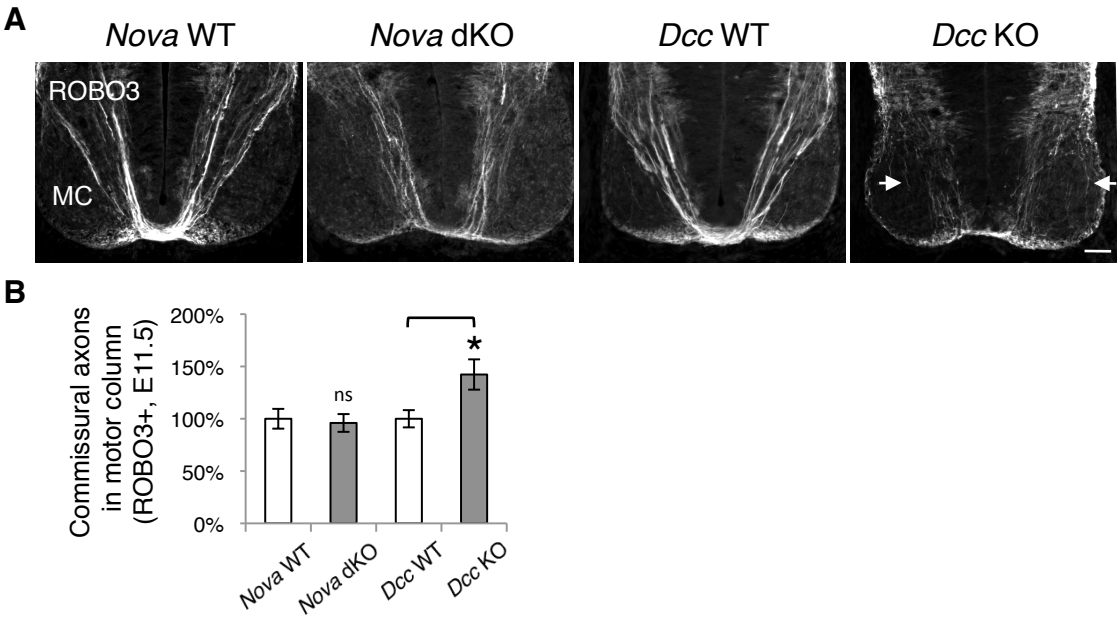

Supplement: supp [file elife-14264-supp-v1.zip]

Figure 7-figure supplement 3

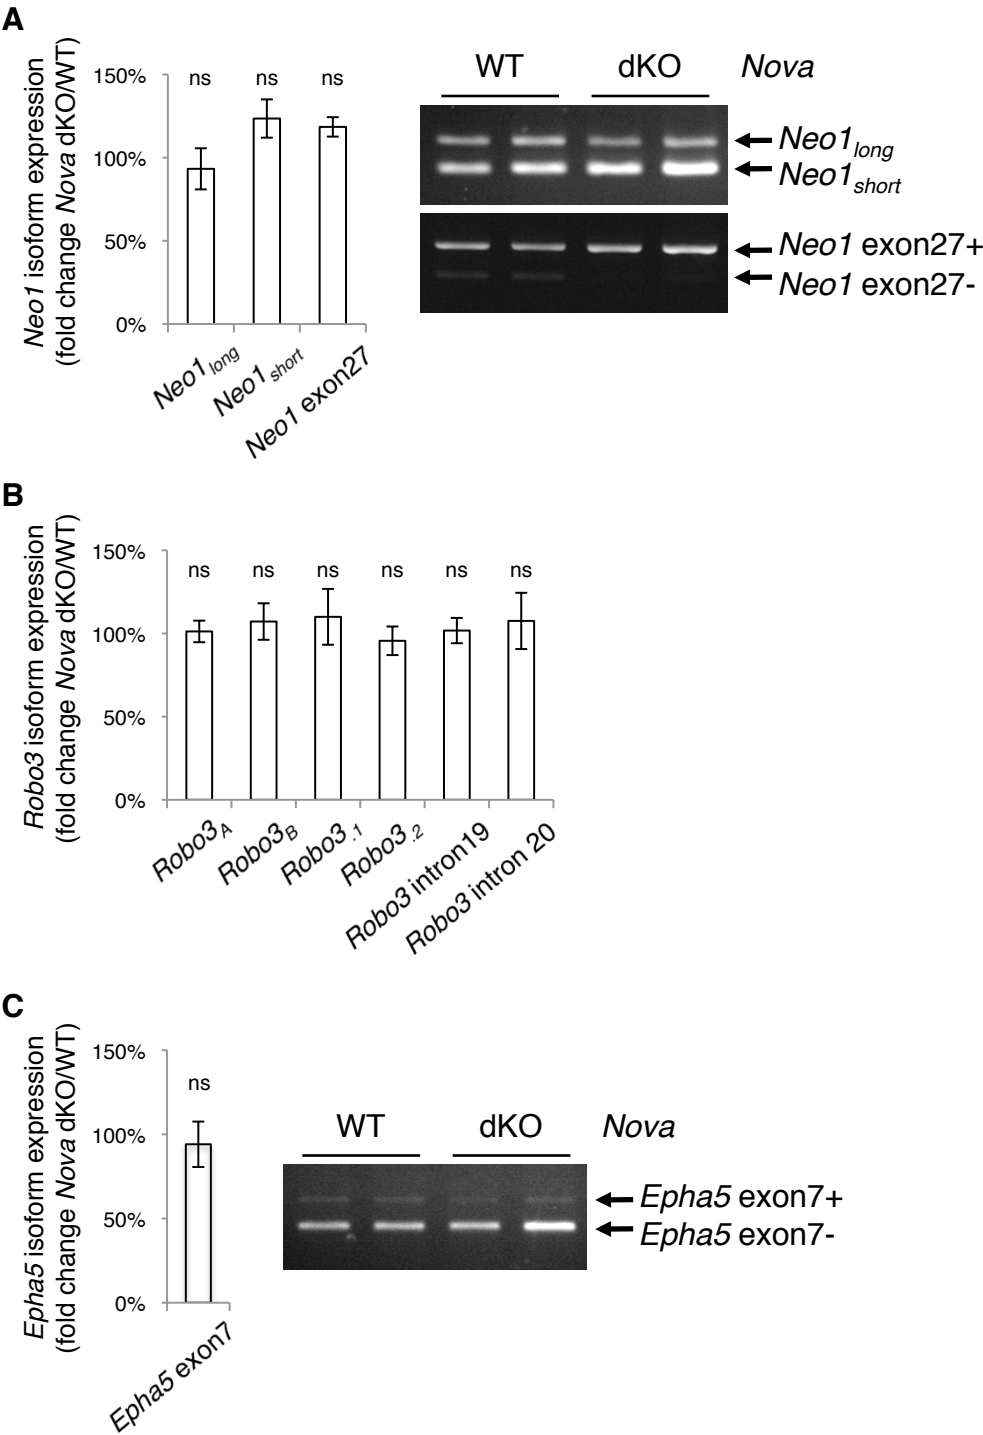

Supplement: supp [file elife-14264-supp-v1.zip]

Figure 7-figure supplement 1

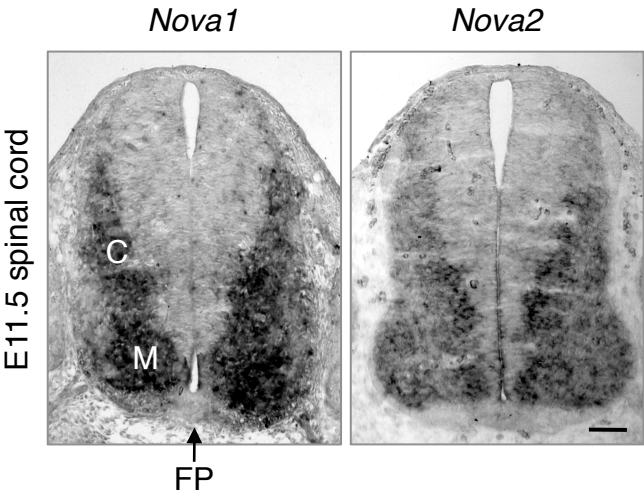

Supplement: supp [file elife-14264-supp-v1.zip]

Figure 2-figure supplement 1

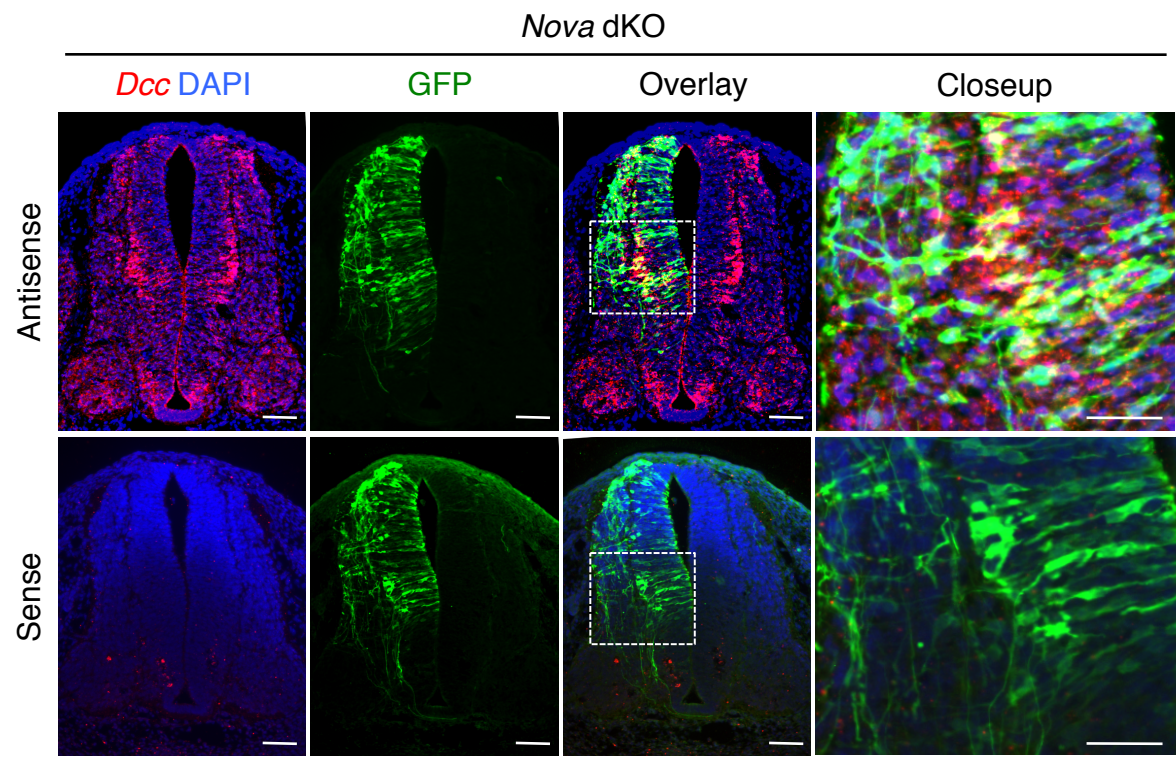

Supplement: supp [file elife-14264-supp-v1.zip]

Figure 8-figure supplement 1

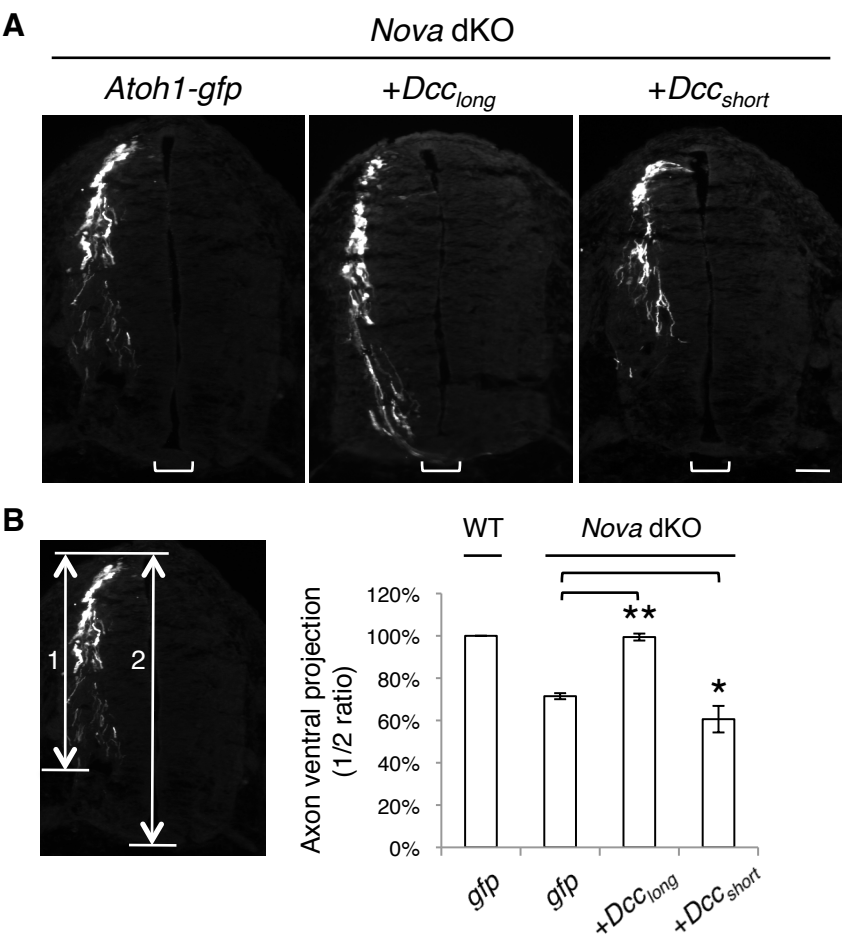

Supplement: supp [file elife-14264-supp-v1.zip]

Figure 3-figure supplement 1

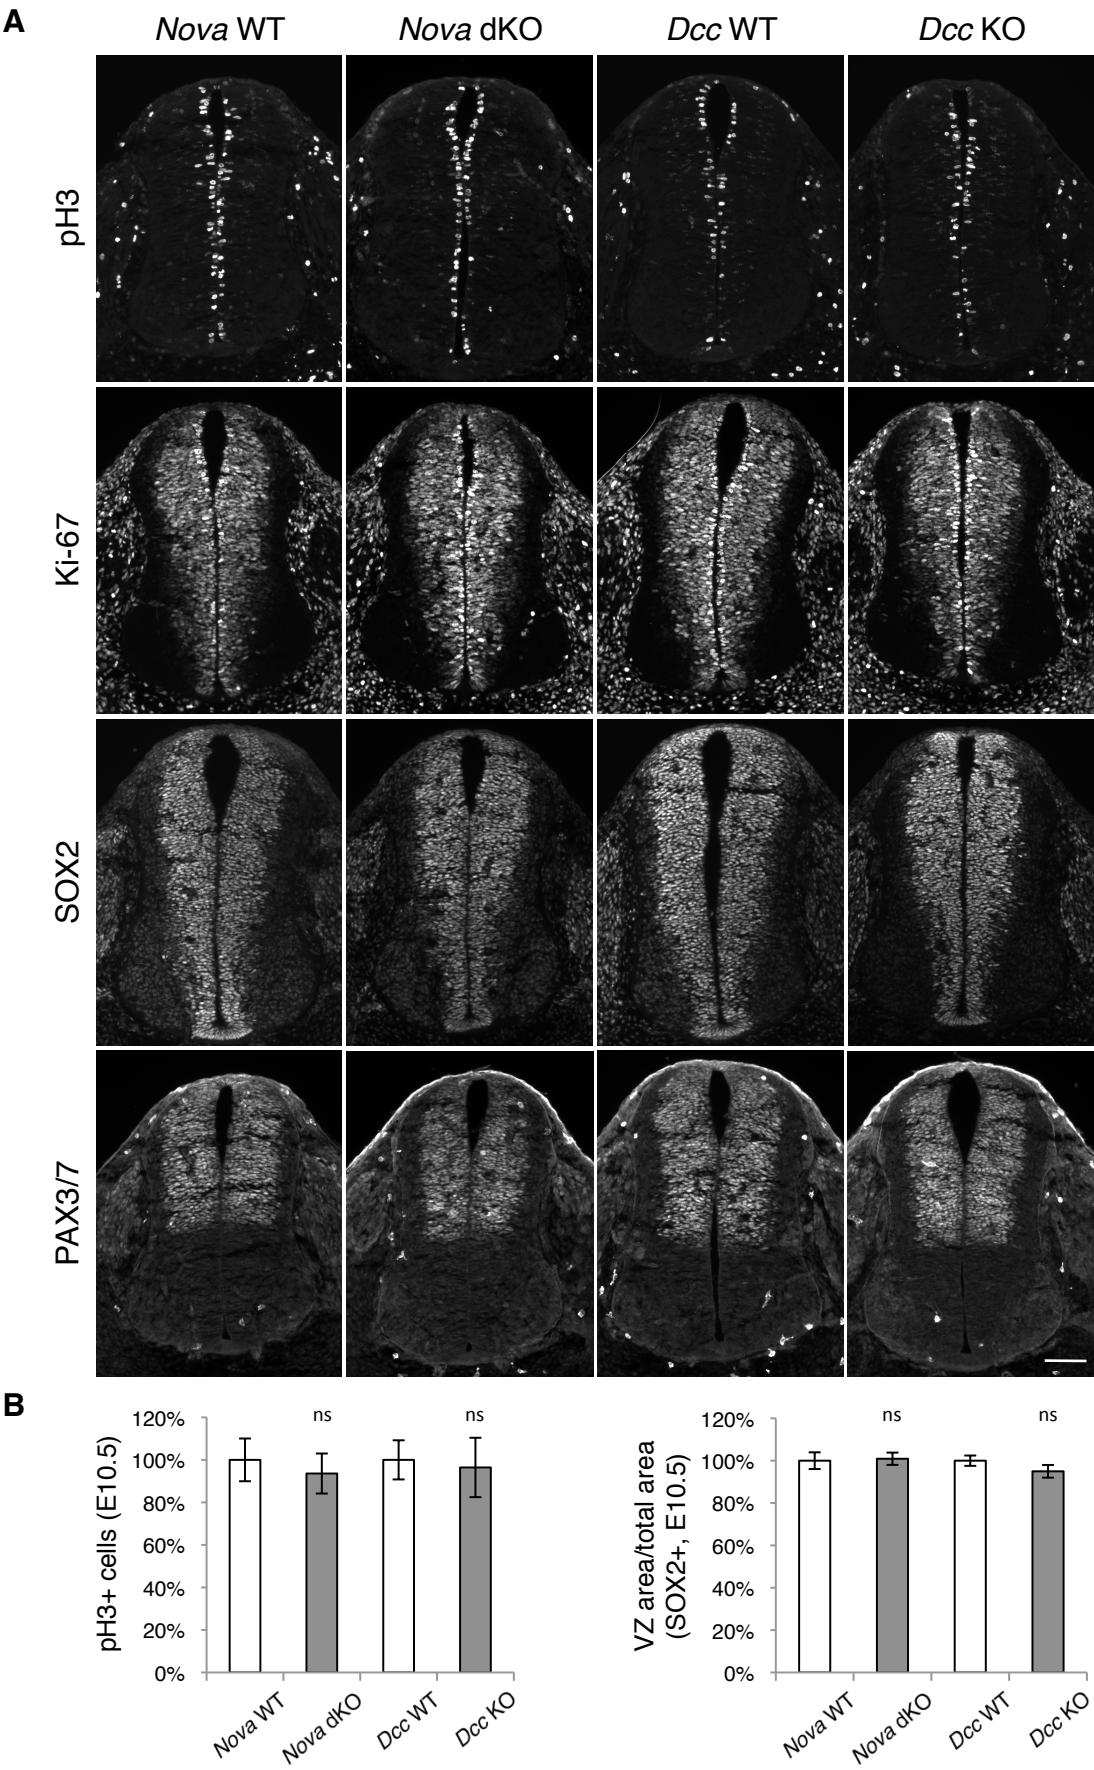

Supplement: supp [file elife-14264-supp-v1.zip]
